# Supplementary material for: Immune System Dysfunction Criteria in Critically Ill Children: The PODIUM Consensus Conference
Source: Oxford University Press journal article supplement (doi:10.1542/peds.2021-052888n), 2021-12-31
Supplement: peds_2021052888nsupplementarydata.pdf [file peds_2021052888nsupplementarydata.pdf]

## **Immune System Dysfunction Criteria in Critically Ill Children:**

### **The PODIUM Consensus Conference**

Mark W. Hall MD<sup>a</sup>, Joseph A. Carcillo MD<sup>b</sup>, Timothy Cornell MD<sup>c</sup>, on behalf of the PODIUM Collaborative

### **Data Supplement**

#### **Table of Contents**

| <b>Content</b>                                                                                                                                                   | <b>Pages</b> |
|------------------------------------------------------------------------------------------------------------------------------------------------------------------|--------------|
| <b>Supplemental Figure 1.</b> Risk of Bias Assessment Summary for Studies Included in the PODIUM Immune System Dysfunction Systematic Review (n=39 studies)      | 2            |
| <b>Supplemental Table 1.</b> Studies Included in the PODIUM Immune System Dysfunction Systematic Review (n=39 studies)                                           | 3-7          |
| <b>Supplemental Table 2.</b> Performance Characteristics for Assessment Tools and Scores for Immune System Dysfunction in Critically Ill Children (n=39 studies) | 8-13         |
| <b>References</b>                                                                                                                                                | 14-17        |
| <b>Research Priorities</b>                                                                                                                                       | 18-22        |

**Supplemental Figure 1.** Risk of Bias Assessment Summary for Studies Included in the PODIUM Immune System Dysfunction Systematic Review (n=39 studies)

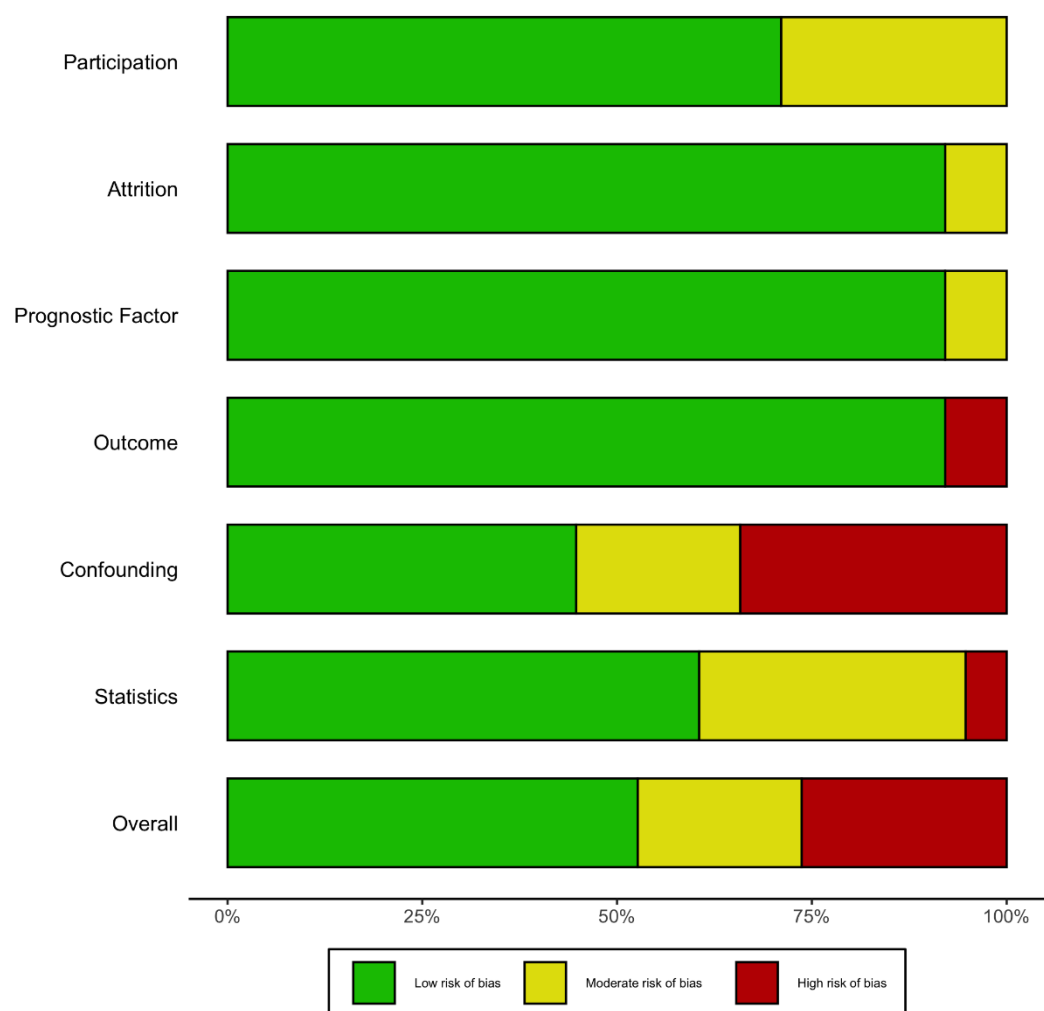

**Supplemental Table 1. Studies Included in the PODIUM Immune System Dysfunction Systematic Review (n=39 studies)**

| Author (yr)        | Funding                     | Study design                                          | Location                              | No. of sites | Study years | Setting                                          | Data source(s)              | Sample size                                                                                             | Recruitment                                                        | Age categories <sup>a</sup>                    | Age details <sup>b</sup>                           |
|--------------------|-----------------------------|-------------------------------------------------------|---------------------------------------|--------------|-------------|--------------------------------------------------|-----------------------------|---------------------------------------------------------------------------------------------------------|--------------------------------------------------------------------|------------------------------------------------|----------------------------------------------------|
| Allen (2006)       | NGO                         | Prospective cohort                                    | UK                                    | 1            | NR          | PCICU (cardiac only)                             | Prospective data collection | 36                                                                                                      | Consecutive                                                        | Neonates<br>Infants<br>Children                | Median 6.5 mo [range, 9 days-24 mo]                |
| Allen (2002)       | NGO                         | Prospective cohort                                    | United Kingdom                        | 1            | 1999-1999   | PCICU (cardiac only)                             | Prospective data collection | 82                                                                                                      | Convenience                                                        | Neonates<br>Infants<br>Children<br>Adolescents | Median age 10 mo [range 2 days to 16 yr]           |
| Andruszkow (2014)  | NGO                         | Prospective cohort                                    | Germany                               | 1            | 2005-2008   | PICU of unknown composition, Emergency room (ER) | Prospective data collection | 59                                                                                                      | NR/Unable to determine                                             | Neonates<br>Infants<br>Children<br>Adolescents | Mean 8.4 (4.4) yr                                  |
| Boeddha (2018)     | Govt.                       | Prospective cohort                                    | The Netherlands                       | 1            | 2012-2015   | PICU (non-cardiac only)                          | Prospective data collection | 37 PICU patients/cases and 37 healthy controls                                                          | Consecutive                                                        | Neonates<br>Infants<br>Children<br>Adolescents | Median 9 yr [IQR, 5-13]                            |
| Bucuvalas (2013)   | Govt.                       | Prospective cohort                                    | United States, United Kingdom, Canada | 17           | NR          | NR/Unable to determine                           | Prospective data collection | 77                                                                                                      | Convenience                                                        | Neonates<br>Infants<br>Children<br>Adolescents | Median 9.0 yr [IQR 3.5, 16.0]                      |
| Cabrera (2009)     | NR                          | Retrospective cohort                                  | USA                                   | 1            | 2003-2005   | PCICU (cardiac only)                             | Chart review                | 280                                                                                                     | Consecutive                                                        | Neonates<br>Infants<br>Children                | Mean 165 days (203)                                |
| Carcillo (2017)    | Govt.                       | Prospective cohort, Observational/descriptive study   | United States                         | 1            | NR          | NR/Unable to determine                           | Prospective data collection | 100                                                                                                     | Consecutive                                                        | Neonates<br>Infants<br>Children<br>Adolescents | Mean 5.82 yr (5.69)                                |
| Christensen (2012) | Other (No external funding) | Retrospective cohort, Observational/descriptive study | United States                         | 1            | 2001-2010   | Other:                                           | Registry, Other:            | 29 627 to construct the lymphocyte normal ranges; 40 487 with lymphocyte counts were assessed for risks | Other (All neonates in data base, 2001-2020 with lymphocyte count) | Neonates                                       | Gestational ages at birth ranging from 23-42 weeks |
| Cornell (2012)     | Govt.                       | Prospective cohort, Observational/descriptive study   | United States                         | 1            | 2005-2009   | PCICU (cardiac only)                             | Prospective data collection | 69 patients with post-op day one ex vivo mononuclear                                                    | NR/Unable to determine                                             | Neonates<br>Infants<br>Children<br>Adolescents | Median 10 mo [range 6 days-16 yr]                  |

|                       |               |                                                     |               |    |           |                               |                             |                                                                            |                        |                                                |                                                                                                                                                                 |
|-----------------------|---------------|-----------------------------------------------------|---------------|----|-----------|-------------------------------|-----------------------------|----------------------------------------------------------------------------|------------------------|------------------------------------------------|-----------------------------------------------------------------------------------------------------------------------------------------------------------------|
|                       |               |                                                     |               |    |           |                               |                             | cell TNF $\alpha$ production                                               |                        |                                                |                                                                                                                                                                 |
| Cui (2019)            | Govt.         | Case/control study (case matched)                   | China         | 1  | 2014-2017 | PICU (non-cardiac only)       | Prospective data collection | Sepsis (n=69), of which HLH (n=23) and no HLH (n=46)                       | Convenience            | Infants<br>Children<br>Adolescents             | Median 22 mo [IQR, 9-48]                                                                                                                                        |
| Felmet 2005)          | Govt.,<br>NGO | Prospective cohort                                  | USA           | 1  | 1999-2000 | PICU (non-cardiac only)       | Prospective data collection | 58 cases, 5r controls (children without multiple organ failure in the ICU) | Consecutive            | Neonates<br>Infants<br>Children<br>Adolescents | Mean 7.5 ry [range, 2 weeks-23 yr]                                                                                                                              |
| Fiore-Gartland (2017) | Govt.         | Prospective cohort, Observational/descriptive study | United States | 35 | 2008-2016 | NR/Unable to determine        | Prospective data collection | 171 derivation; 76 validation                                              | NR/Unable to determine | Infants<br>Children<br>Adolescents             | Median 6.5 yr [IQR 3.4, 10.9]                                                                                                                                   |
| Ganda (2018)          | NR            | Prospective cohort, Observational/descriptive study | Indonesia     | 1  | 2015-2016 | PICU of unknown composition   | Prospective data collection | 70                                                                         | NR/Unable to determine | Infants<br>Children<br>Adolescents             | NR                                                                                                                                                              |
| Ganda (2018)          | NR            | Prospective cohort, Observational/descriptive study | Indonesia     | 1  | 2016-2017 | PICU of unknown composition   | Prospective data collection | 70                                                                         | NR/Unable to determine | Neonates<br>Infants<br>Children<br>Adolescents | Median [range] septic shock 4.25 [0.08 to 15.5 yr]; sepsis 5.08 [0.08 to 16 yr]                                                                                 |
| Genel (2010)          | NR            | Prospective cohort, Observational/descriptive study | Turkey        | 1  | 2007-2008 | Other:                        | Prospective data collection | 89: 40 sepsis; 24 non-infected; 25 control                                 | Consecutive            | Neonates                                       | Infected: n=40, 37.5 +/- 3.8 wks; non-infected: n=24, 38.3 (2.7) wks; controls: n=25, 37.7 (3.1) wks. 10 premature infants were included in the infection group |
| Hall (2013)           | Govt.         | Prospective cohort, Observational/descriptive study | United States | 15 | 2008-2009 | PICU of unknown composition   | Prospective data collection | 52 with influenza; 21 control patients                                     | Convenience            | Neonates<br>Infants<br>Children<br>Adolescents | Median [IQR] 7.3 [2.4-14] yrs                                                                                                                                   |
| Hall (2007)           | Govt.         | Prospective cohort                                  | USA           | 1  | 2003-2004 | PICU (non-cardiac only)       | Prospective data collection | 30                                                                         | Consecutive            | Neonates<br>Infants<br>Children<br>Adolescents | Median 4y [IQR, 1-11]                                                                                                                                           |
| Hall (2011)           | Govt.         | Prospective cohort                                  | USA           | 2  | NR        | PICU (non-cardiac only)       | Prospective data collection | 70 cases and 80 controls                                                   | Consecutive            | Infants<br>Children<br>Adolescents             | Cases, Median 5y [IQR, 1-15]; controls, 9.8y [IQR, 8-12]                                                                                                        |
| Hoffman (2004)        | NR            | Prospective cohort, Observational/                  | United States | 1  | 2000-2003 | Other: NR/Unable to determine | Prospective data collection | 13                                                                         | NR/Unable to determine | Children<br>Adolescents                        | Median 15 yr [range 10-18]                                                                                                                                      |

|                  |                                                    |                                                       |               |   |           |                                                         |                                           |                                                                                                              |                                                         |                                                |                                                                          |
|------------------|----------------------------------------------------|-------------------------------------------------------|---------------|---|-----------|---------------------------------------------------------|-------------------------------------------|--------------------------------------------------------------------------------------------------------------|---------------------------------------------------------|------------------------------------------------|--------------------------------------------------------------------------|
|                  |                                                    | descriptive study                                     |               |   |           |                                                         |                                           |                                                                                                              |                                                         |                                                |                                                                          |
| Ibrahiem (2016)  | NR                                                 | Prospective cohort, Observational/descriptive study   | Egypt         | 1 | 2014-2014 | NR/Unable to determine                                  | Prospective data collection               | 57                                                                                                           | Other (Probably convenience; no consort (flow) diagram) | Neonates<br>Infants<br>Children                | 1.5 yr [IQR: 1.0---3.0]                                                  |
| Jacobs (2018)    | Govt.                                              | Prospective cohort, Observational/descriptive study   | United States | 1 | 2016-2017 | PICU (non-cardiac only), Hospital floor outside the ICU | Chart review, Prospective data collection | 293 patients; 400 suspected new infections                                                                   | Consecutive                                             | Infants<br>Children<br>Adolescents             | Median 7.8 yr [IQR 3.1-13.8 yr]                                          |
| Lodwick (2017)   | NR                                                 | Retrospective cohort, Observational/descriptive study | United States | 1 | 2012-2014 | Other:                                                  | Chart review, EMR query, Registry         | 551                                                                                                          | Consecutive                                             | Children<br>Adolescents                        | Median [IQR] 10 [7-13]                                                   |
| Manzoli (2016)   | NGO, Other (FAPESP, process number 2012/5017 3-6.) | Prospective cohort, Observational/descriptive study   | Brazil        | 1 | 2013-2015 | PICU of unknown composition                             | Prospective data collection               | 30 patients with sepsis; 21 controls                                                                         | Other (Perhaps consecutive; more likely convenience)    | Infants<br>Children<br>Adolescents             | Mean age (mo) survivors 99 (69.5); non-survivors, 28.5 (51.9)            |
| Mella (2013)     | Govt., NGO                                         | Prospective cohort                                    | USA           | 1 | 2010-2011 | PICU (non-cardiac only), Hospital floor outside the ICU | Prospective data collection               | ICU cases (n=20), floor cases (n=46), healthy controls (n=14)                                                | Convenience                                             | Neonates<br>Infants<br>Children                | Cases, Median 2.6m [IQR, 1.6-4.45]; controls, Median 6.8m [IQR, 2.7-9.2] |
| Muszynski (2014) | Govt., NGO                                         | Prospective cohort, Observational/descriptive study   | United States | 1 | 2007-2010 | PICU (non-cardiac only)                                 | Prospective data collection, EMR query    | 76 critically injured children and 21 outpatient controls                                                    | NR/Unable to determine                                  | Children<br>Adolescents                        | Median [IQR] 9.9 [4.5-14.5] yr                                           |
| Muszynski (2018) | Govt.                                              | Prospective cohort                                    | USA           | 1 | NR        | PICU (non-cardiac only)                                 | Prospective data collection               | 102 cases, 35 controls                                                                                       | Consecutive                                             | Neonates<br>Infants<br>Children<br>Adolescents | Median 74.5m [IQR, 6-160]                                                |
| Odek (2014)      | NR                                                 | Retrospective cohort                                  | Turkey        | 1 | 2002-2012 | PICU of unknown composition                             | Chart review                              | 51 patients; 65 admissions. Patients were included if they were admitted to PICU for a problem related their | Convenience                                             | Infants<br>Children<br>Adolescents             | Median age 12 mo [Range 2 mo to 18 yrs]                                  |

|                |                          |                                   |        |    |           |                         |                             |                                                                                                 |             |                                                |                                                                                                                                                             |
|----------------|--------------------------|-----------------------------------|--------|----|-----------|-------------------------|-----------------------------|-------------------------------------------------------------------------------------------------|-------------|------------------------------------------------|-------------------------------------------------------------------------------------------------------------------------------------------------------------|
|                |                          |                                   |        |    |           |                         |                             | primary immunodeficiency???                                                                     |             |                                                |                                                                                                                                                             |
| Savluk (2019)  | Other (Reported as none) | Prospective cohort                | Turkey | 1  | 2011-2015 | PICU (cardiac only)     | Prospective data collection | 53                                                                                              | Consecutive | Neonates                                       | Survivors: Mean, 16.5d (1.4); non-survivors: Mean, 16.1d (1.8)                                                                                              |
| Tekin (2019)   | NR                       | Retrospective cohort              | Turkey | 1  | 2010-2018 | Emergency room (ER)     | Chart review                | 358                                                                                             | Consecutive | Neonates<br>Infants<br>Children<br>Adolescents | Mean, 8.96y [SD, 5.51]                                                                                                                                      |
| Thakkar (2018) | NGO                      | Retrospective cohort              | USA    | 1  | NR        | PICU (non-cardiac only) | Registry                    | 138                                                                                             | Consecutive | Neonates<br>Infants<br>Children<br>Adolescents | Summary not provided, only age categories but not for the entire cohort                                                                                     |
| Weiss (2019)   | Govt., NGO               | Case/control study (case matched) | USA    | 1  | 2014-2018 | PICU (non-cardiac only) | Prospective data collection | 167 cases (sepsis/septic shock) and 19 controls (no sepsis, no infection, no organ dysfunction) | Consecutive | Infants<br>Children<br>Adolescents             | Median, 8.1y [IQR, 3.4-13.7]                                                                                                                                |
| Wong (2012)    | Govt.                    | Prospective cohort                | USA    | 17 | NR        | PICU (non-cardiac only) | Prospective data collection | 220                                                                                             | Consecutive | Neonates<br>Infants<br>Children                | Median, 2.2y [IQR, 0.8, 5.9]                                                                                                                                |
| Wong (2014)    | Govt., NGO               | Prospective cohort                | USA    | 17 | 2009-2013 | PICU (non-cardiac only) | Prospective data collection | 182                                                                                             | Consecutive | Neonates<br>Infants<br>Children<br>Adolescents | Median, 5.5 [IQR, 1.6-13]                                                                                                                                   |
| Wong (2015)    | Govt.                    | Prospective cohort                | USA    | 17 | NR        | PICU (non-cardiac only) | Prospective data collection | 241 (derivation cohort) and separate 200 (testing cohort)                                       | Consecutive | Neonates<br>Infants<br>Children                | Derivation cohort, Median 2.5y [IQR, 0.8-5.9]                                                                                                               |
| Wong (2015)    | Govt.                    | Prospective cohort                | USA    | 17 | 2009-2013 | PICU (non-cardiac only) | Prospective data collection | training (n = 374) and test (n = 93) sets                                                       | Consecutive | Neonates<br>Infants<br>Children<br>Adolescents | Training set, Median 3.0y [IQR, 1.0-7.5]; test set, Median 5.6y [IQR, 1.6-9.9]                                                                              |
| Wong (2017)    | Govt.                    | Prospective cohort                | USA    | 17 | 2009-2013 | PICU (non-cardiac only) | Prospective data collection | 307 derivation cohort and 77 test cohort                                                        | Consecutive | Neonates<br>Infants<br>Children                | Median [IQR], yr, derivation cohort, survivors 2.5 [1.0-6.5]; non-survivors 1.4 [0.4-5.9]; test cohort survivors 2.0 [0.6-5.5], non-survivors 0.9 [0.2-3.6] |
| Xu (2013)      | Govt.                    | Prospective cohort                | China  | 1  | 2006-2012 | PICU (non-cardiac only) | Prospective data collection | 111                                                                                             | Consecutive | Infants<br>Children<br>Adolescents             | Median 8.6y [range, 3m-15.1y]                                                                                                                               |

|               |       |                    |     |   |           |                         |                             |     |             |                                    |                             |
|---------------|-------|--------------------|-----|---|-----------|-------------------------|-----------------------------|-----|-------------|------------------------------------|-----------------------------|
| Yehya (2018)  | Govt. | Prospective cohort | USA | 1 | 2014-2016 | PICU (non-cardiac only) | Prospective data collection | 152 | Consecutive | Infants<br>Children<br>Adolescents | Median 4.2y [IQR, 1.5-10.4] |
| Zinter (2017) | Govt. | Prospective cohort | USA | 5 | 2008-2015 | PICU (non-cardiac only) | Prospective data collection | 194 | Consecutive | Infants<br>Children<br>Adolescents | Median 4.9y [IQR, 0.9-11.5] |

Abbreviations: Govt., government; NGO, nongovernmental organization; NR, not reported; PICU, pediatric intensive care unit; PCICU, pediatric cardiac intensive care unit; IQR, interquartile range; SD, standard deviation; mo, months; yr, years

<sup>a</sup> Neonates (0 to 30 days), Infants (31 days to < 1 year), Children (1 year to < 12 years), Adolescents (12 years to < 18 years)

<sup>b</sup> Data are presented as mean (SD) or median [IQR, range]

**Supplemental Table 2. Performance Characteristics for Assessment Tools and Scores for Immune System Dysfunction in Critically Ill Children (n=39 studies)**

| Author (yr)        | Score/assessment tool                                                                                                        | Is this a study of score/tool derivation or validation? | Inclusion criteria                           | Timing of score/tool assessment                                                                                                                                                                                                                                                         | Outcomes                                                                                      | Performance characteristics                                                                                                                                                                                                                     |
|--------------------|------------------------------------------------------------------------------------------------------------------------------|---------------------------------------------------------|----------------------------------------------|-----------------------------------------------------------------------------------------------------------------------------------------------------------------------------------------------------------------------------------------------------------------------------------------|-----------------------------------------------------------------------------------------------|-------------------------------------------------------------------------------------------------------------------------------------------------------------------------------------------------------------------------------------------------|
| Allen (2006)       | Serum/plasma cytokine concentration, Other (IL-10 and LPS-stimulated cytokine production (IL-1ra, IL-6, IL-8, IL-10, TNF-a)) | Other (Investigational)                                 | PCICU population (only cardiac)              | a) Following induction and insertion of arterial catheter; b) on release of the aortic cross-clamp; c) after the end of CPB; d) following modified ultrafiltration; e) on arrival to the cardiac intensive care unit; and f) 2, 4, 8, 14, 18, 24, and 48 hrs after admission to the ICU | Other (ICU LOS)                                                                               | Other: uOR: (short vs long ICU LOS of >5d): patients in whom the whole blood response to endotoxin was maintained (TNF-a>100 pg/mL) over the first 48 hrs were more likely to have an uncomplicated short stay (uOR 4.7, 95%CI, 1-22).          |
| Allen (2002)       | Other (HLA-DR expression)                                                                                                    | Derivation                                              | PCICU population (only cardiac)              | Lowest value within 72 hours of surgery                                                                                                                                                                                                                                                 | Other (Prolonged stay, development of sepsis, sepsis/SIRS)                                    | AUROC: Development of sepsis/SIRS 0.85, long stay 0.75, sepsis 0.84                                                                                                                                                                             |
| Andruszkow (2014)  | Serum/plasma cytokine concentration                                                                                          | Derivation                                              | Other (Trauma population)                    | Upon admission then every morning for 14 days                                                                                                                                                                                                                                           | Mortality, Outcomes related to MODS                                                           | AUROC: IL-6 on day 2 AUC of 0.921 towards MODS                                                                                                                                                                                                  |
| Boeddha (2018)     | Other (HLA-DR expression on monocyte subsets)                                                                                | Other (Investigational)                                 | Sepsis, Other (Post-surgery and trauma)      | Admission and on days 2, 3 and 4 of PICU stay                                                                                                                                                                                                                                           | Mortality, Other (Nosocomial infection)                                                       | Other: Two-group comparisons: Patients who developed nosocomial infections (n = 13) or who died (n = 6) had lower HLA-DR expression on classical monocytes at day 2 (P = 0.002) and day 3 (P = 0.04), respectively                              |
| Bucuvalas (2013)   | Serum/plasma cytokine concentration, Other (T-cell Immune Activation Markers)                                                | Derivation                                              | Other (Acute liver failure)                  | Within 48 hours of enrollment in                                                                                                                                                                                                                                                        | Mortality, Organ-specific outcomes/residual morbidity                                         | Other: No test characteristics described                                                                                                                                                                                                        |
| Cabrera (2009)     | Lymphocyte count                                                                                                             | Other (Investigational)                                 | PCICU population (only cardiac)              | Preoperative absolute lymphopenia (absolute lymphocyte count of less than 3000 cells/mL)                                                                                                                                                                                                | Mortality, Other (Hospital LOS, length of mechanical ventilation)                             | aOR: For the outcome of postoperative mortality, aOR 9.3 (95%CI, 1.8-48)                                                                                                                                                                        |
| Carcillo (2017)    | Other (Serum ferritin and C-reactive protein)                                                                                | Derivation                                              | Sepsis                                       | First blood sample (for scoring) 2 days following admission                                                                                                                                                                                                                             | Mortality, Other (Development of immunoparalysis and/or macrophage activation syndrome (MAS)) | AUROC: Mortality<br>Youden's index (J statistic): To identify optimal thresholds for each outcome<br>aOR: Mortality, immunoparalysis, MAS<br>Other: Transition from one risk category to another over time was predictive of risk for mortality |
| Christensen (2012) | Lymphocyte count                                                                                                             | Derivation                                              | Other (Neonates with lymphocyte count within | Lymphocyte counts within first 72 hrs of life                                                                                                                                                                                                                                           | Mortality, Organ-specific outcomes/residual morbidity, Other (Early onset                     | aOR: Early onset sepsis, intraventricular hemorrhage, retinopathy of prematurity, mortality                                                                                                                                                     |

|                       |                                                                                                                                                        |                                                |                                                                          |                                                                            |                                                                                                                                                |                                                                                                                                                                                                                                                                                                             |
|-----------------------|--------------------------------------------------------------------------------------------------------------------------------------------------------|------------------------------------------------|--------------------------------------------------------------------------|----------------------------------------------------------------------------|------------------------------------------------------------------------------------------------------------------------------------------------|-------------------------------------------------------------------------------------------------------------------------------------------------------------------------------------------------------------------------------------------------------------------------------------------------------------|
|                       |                                                                                                                                                        |                                                | first 72 hrs of life)                                                    |                                                                            | sepsis, intraventricular hemorrhage, retinopathy of prematurity)                                                                               |                                                                                                                                                                                                                                                                                                             |
| Cornell (2012)        | Serum/plasma cytokine concentration, Other (Ex vivo TNF $\alpha$ production; serum IL-10 concentrations; histone methylation status (6 patients only)) | Derivation                                     | PCICU population (only cardiac)                                          | Pre-op, day of surgery, post-op days 1, 3, 5                               | Other (Hospital acquired infections)                                                                                                           | Se: Hospital acquired infections<br>Sp: Hospital acquired infections<br>PPV: Hospital acquired infections<br>NPV: Hospital acquired infections<br>AUROC: Hospital acquired infections                                                                                                                       |
| Cui (2019)            | Other (sCD163 levels and mCD163 (the percentage of CD163-positive peripheral blood mononuclear cells))                                                 | Other (Investigational)                        | Sepsis                                                                   | Within 24h after enrollment (children with presumed sepsis with fever >7d) | Mortality                                                                                                                                      | Se: for the outcome of 28d mortality in children with sepsis associated HLH, sCD163 cutoff 2.001mg/L, 71.4%<br>Sp: 100%<br>AUROC: 0.857 (95% CI: 0.659-1.000)<br>aOR: sCD163 for outcome of sepsis associated HLH development in children with presumed sepsis, aOR 3.091 (95%CI, 1.086-8.797)              |
| Felmet 2005)          | Other (Prolonged lymphopenia, lymphoid depletion, and hypoprolactinemia)                                                                               | Other (Investigational)                        | Sepsis                                                                   | Days 1, 3, 7, 14, and 21                                                   | Mortality, Other (Nosocomial infection)                                                                                                        | aOR: Prolonged lymphopenia (absolute lymphocyte count < 1000 for >7 days) for outcome of nosocomial infection, aOR 5.5 (95%CI, 1.7-17), death, aOR 6.8 (95%CI, 1.3-34).                                                                                                                                     |
| Fiore-Gartland (2017) | Serum/plasma cytokine concentration, Other (Individual and various modules of cytokines)                                                               | Other (Both derivation and validation cohorts) | Other (Critically ill children with influenza; location of care unclear) | At enrollment, mostly at the time of PICU admission                        | Mortality, Outcomes related to MODS, Other (Development of shock, acute lung injury/ARDS, need for mechanical ventilation, and ECLS/mortality) | aOR: Development of shock, acute lung injury/ARDS, need for mechanical ventilation, and ECLS/mortality                                                                                                                                                                                                      |
| Ganda (2018)          | Serum/plasma cytokine concentration, Other (TNF $\alpha$ )                                                                                             | Derivation                                     | Sepsis                                                                   | Presumably at admission to PICU                                            | Other (Stated risk for development of septic shock, but likely many patients had septic shock when they were enrolled)                         | Se: Sepsis versus septic shock<br>Sp: Sepsis versus septic shock<br>PPV: Sepsis versus septic shock<br>NPV: Sepsis versus septic shock<br>AUROC: Sepsis versus septic shock<br>Other: P-value comparing TNF $\alpha$ in patients with sepsis and septic shock was 0.05, but AUROC =100, does not make sense |
| Ganda (2018)          | Serum/plasma cytokine concentration, Other (IL-10)                                                                                                     | Derivation                                     | Sepsis                                                                   | Within 24 hours of PICU admission                                          | Outcomes related to MODS, Other (Development of septic shock)                                                                                  | Se: Development of septic shock<br>Sp: Development of septic shock<br>PPV: Development of septic shock<br>NPV: Development of septic shock<br>AUROC: Development of septic shock                                                                                                                            |
| Genel (2010)          | Mononuclear cell count, Other (HLH-DR expression (% and fluorescent intensity) on circulating                                                          | Derivation                                     | Other (Neonatal intensive care unit)                                     | First day of suspected sepsis                                              | Mortality                                                                                                                                      | Se: Mortality: 87.5%<br>Sp: Mortality: 81.3%<br>AUROC: Mortality: %HLA-DR expressing monocytes as a predictor of mortality was 0.89 (95% CI 0.751-.03,p=0.001) and for MFI of HLA-DR 0.80 (95% CI 0.65-0.96, p=0.008)                                                                                       |

|                 |                                                                                                                                                                                                 |                         |                                                                                 |                                                                               |                                                                                     |                                                                                                                                                                                                                                                                                                                                                                                                                                                                                                      |
|-----------------|-------------------------------------------------------------------------------------------------------------------------------------------------------------------------------------------------|-------------------------|---------------------------------------------------------------------------------|-------------------------------------------------------------------------------|-------------------------------------------------------------------------------------|------------------------------------------------------------------------------------------------------------------------------------------------------------------------------------------------------------------------------------------------------------------------------------------------------------------------------------------------------------------------------------------------------------------------------------------------------------------------------------------------------|
|                 | mononuclear leukocytes (blinded to clinical status))                                                                                                                                            |                         |                                                                                 |                                                                               |                                                                                     | aOR: Mortality: HLA-DR expression 30% had lowered survival rate with a 30-fold higher risk of mortality (Odds ratio 30; 95% CI 3-295).                                                                                                                                                                                                                                                                                                                                                               |
| Hall (2013)     | Serum/plasma cytokine concentration, Other (Primary: ex vivo LPS-stimulated monocyte TNFa production; absolute mononuclear cell count)                                                          | Derivation              | Other (Children with acute respiratory failure with PCR-positive for influenza) | Single time point within 72 hrs of ICU admission (median [IQR] 31 [15-48] hrs | Mortality, Other (PICU duration of stay)                                            | Se: Mortality as function of Ex vivo TNF production: 67%<br>Sp: Mortality as function of Ex vivo TNF production: 100%<br>PPV: Mortality as function of Ex vivo TNF production: 100%<br>NPV: Mortality as function of Ex vivo TNF production: 91%<br>AUROC: Mortality as function of Ex vivo TNF production: 0.97                                                                                                                                                                                     |
| Hall (2007)     | Serum/plasma cytokine concentration, Other (Ex vivo lipopolysaccharide (LPS)- induced TNF-production and plasma cytokines)                                                                      | Other (Investigational) | Other (Children with dysfunction of two or more organs)                         | Twice weekly beginning on d 3 of MODS                                         | Mortality                                                                           | Other: Two group comparisons: High mRNA levels for interleukin (IL)-10, IL-1 receptor-associated kinase (IRAK-M), and the putative inflammasome inhibitor pyrin were associated with death ( $p \leq 0.02$ ). Plasma IL-10 levels were higher and ex vivo TNF-alpha production was lower in non-survivors ( $p < 0.05$ ). Among survivors, high mRNA levels for IL-10, IRAK-M, pyrin, IRAK1, or TLR4 were associated with longer durations of PICU stay and mechanical ventilation ( $p \leq 0.02$ ) |
| Hall (2011)     | Other (Monocyte HLA-DR expression; immunoparalysis defined by whole blood ex vivo lipopolysaccharide induced tumor necrosis factor-alpha (TNFa) response $\geq 200$ pg/mL beyond day 3 of MODS) | Other (Investigational) | Other (Children with $\geq 2$ organ dysfunctions and invasive catheter)         | Days 3, 7, and 14 and weekly thereafter following the development of MODS     | Mortality                                                                           | Other: Univariable analyses: associated with increased nosocomial infection (RR 3.3, 95% CI, 1.8-6.0, $p < 0.05$ ) and mortality (RR 5.8, 95% CI, 2.1-16, $p < 0.05$ ). TNFa response $< 200$ pg/mL throughout 7 days after positive culture was associated with persistent nosocomial infection, whereas recovery above 200 pg/mL was associated with resolution of infection ( $p < 0.05$ )                                                                                                        |
| Hoffman (2004)  | Serum/plasma cytokine concentration, Other (Serum IL-10 concentrations; monocyte HLH-DR expression)                                                                                             | Derivation              | Other (Children undergoing living related, lobar lung transplantation)          | Baseline and on post-LT days 7, 14, 21, and 28.                               | Outcomes related to MODS, Other (Development of pneumonia)                          | Other: Recovery of baseline HLH-DR expression; recovery of baseline serum IL-10 concentration                                                                                                                                                                                                                                                                                                                                                                                                        |
| Ibrahiem (2016) | Lymphocyte count, Other (Gamma globulin subtypes; complement components lymphocyte subsets)                                                                                                     | Derivation              | Sepsis, Other (Children with severe sepsis or septic shock)                     | PICU days 1 and 7                                                             | Mortality                                                                           | Se: Day 1 (CD3-CD56/16+ %): 100%<br>Sp: Day 1 (CD3-CD56/16+ %): 86%<br>PPV: Day 1 (CD3-CD56/16+ %): 70%<br>NPV: Day 1 (CD3-CD56/16+ %): 100%<br>AUROC: Day 1 (CD3-CD56/16+ %): 0.950, 95% CI 0.89-1.0                                                                                                                                                                                                                                                                                                |
| Jacobs (2018)   | Serum/plasma cytokine concentration, Other (Serum IL-27 and procalcitonin)                                                                                                                      | Validation              | Sepsis, Other (Immunocompromised with suspicion of infection)                   | Within 6 hrs of sending biosample for culture to document infection           | Mortality, Other (New bacterial infection)                                          | Se: New infection, IL-27 12% [8-19%]<br>Sp: New infection, IL-27 94% [90-96%]<br>PPV: New infection, IL-27 53% [35-70%]<br>NPV: New infection, IL-27 64% [59-69%]<br>AUROC: New infection, IL-27: 0.62 (0.5-0.68); PCT: 0.65 (0.6-0.73)                                                                                                                                                                                                                                                              |
| Lodwick (2017)  | Lymphocyte count, Other (Leukocytosis + lymphopenia)                                                                                                                                            | Derivation              | Other (Children who underwent urgent or emergent appendectomy)                  | Day of discharge following appendectomy                                       | Other (Development of postoperative intra-abdominal abscess following appendectomy) | AUROC: 0.76 for combined leukocytosis + lymphopenia<br>aOR: 3.65 for leukocytosis; 4.46, for lymphopenia                                                                                                                                                                                                                                                                                                                                                                                             |

|                  |                                                                                                                                                                                                                     |                         |                                                                                                         |                                                                                                                     |                                                                                      |                                                                                                                                                                                                                                                                                             |
|------------------|---------------------------------------------------------------------------------------------------------------------------------------------------------------------------------------------------------------------|-------------------------|---------------------------------------------------------------------------------------------------------|---------------------------------------------------------------------------------------------------------------------|--------------------------------------------------------------------------------------|---------------------------------------------------------------------------------------------------------------------------------------------------------------------------------------------------------------------------------------------------------------------------------------------|
| Manzoli (2016)   | Other (Delta PBMC HLR-DR expression (Days 3-5 versus 2-3 days after 1st sample))                                                                                                                                    | Derivation              | Sepsis, Other (Diagnosis of severe sepsis or septic shock)                                              | PICU day 3-5 and then 2-4 days later                                                                                | Mortality, Other (Multiple other outcomes; uncertain which were identified a priori) | Se: 85.7 (95% CI 42.1-99.6)<br>Sp: 65 (95% CI 40.7-99.6)<br>PPV: 46.1 (95% CI 19.2-74.8)<br>NPV: 92.8 (95% CI 66.1-99.8)                                                                                                                                                                    |
| Mella (2013)     | Serum/plasma cytokine concentration, Other (Plasma IL-6, IL-8, IL-10 and TNF-alpha; cytokin production capacity (with LPS stimulation))                                                                             | Other (Investigational) | Other (RSV bronchiolitis)                                                                               | Within 24h of admission                                                                                             | Other (PICU LOS, hospital LOS)                                                       | aOR: Children with impaired TNF- $\alpha$ production capacity (<1000 pg/mL) had almost 6-fold higher odds of being in the hospital >2 days (aOR, 5.82 [95% CI, 1.42-23.85]; P = .014), and worse disease severity as evidenced by a CDSS >10 (aOR, 20.27 [3.63-113.28]; P = .001)           |
| Muszynski (2014) | Serum/plasma cytokine concentration, Other (Ex vivo production of TNFa by mononuclear cells (Ex vivo TNFa <520 pg/mL))                                                                                              | Derivation              | General PICU population (only non-cardiac), Other (Trauma and burn injury)                              | Enrolled on first week day following PICU admission. Serial blood samples on Mon, Wed, and Fri until PICU discharge | Other (Development of nosocomial infection within 14 days)                           | Se: 82% [95% CI: 67-92%]<br>Sp: 86% [95% CI: 42-100%]<br>PPV: 97% [95% CI: 86-100%]<br>NPV: 43% [95% CI: 18-71%]<br>aOR: 10.85 [3.0. 39.3]                                                                                                                                                  |
| Muszynski (2018) | Other (Innate immune function was quantified by whole blood ex vivo LPS-induced TNF-a production capacity. Adaptive immune function was quantified by ex vivo phytohemagglutinin-induced IFN-g production capacity) | Other (Investigational) | Sepsis                                                                                                  | Within 48 hours of sepsis onset                                                                                     | Outcomes related to MODS                                                             | Other: aRR: early innate immune suppression remained independently associated with increased MODS days (aRR, 1.2; 95% CI, 1.03-1.5) and organ dysfunction days (aRR, 1.2; 95% CI, 1.1-1.3)                                                                                                  |
| Odek (2014)      | Other (PRISM, PELOD, need for mechanical ventilation, renal replacement therapy, vasoactive-inotropic support, and PICU duration of stay)                                                                           | Derivation              | General PICU population (mixed cardiac and non-cardiac), Other (Children with primary immunodeficiency) | Variables assessed during PICU admission                                                                            | Mortality                                                                            | Other: Descriptive statistics comparing 38 children who survived with 27 children who died                                                                                                                                                                                                  |
| Savluk (2019)    | Other (Neutrophil-lymphocyte ratio)                                                                                                                                                                                 | Other (Investigational) | PCICU population (only cardiac)                                                                         | Preoperative                                                                                                        | Mortality                                                                            | Se: For the outcome of in-hospital mortality, NLR cutoff 2.57, 78%<br>Sp: For the outcome of in-hospital mortality, NLR cutoff 2.57, 65%<br>AUROC: For the outcome of in-hospital mortality: 0.74 (95% CI 0.63-0.95; p = 0.001)                                                             |
| Tekin (2019)     | Other (Neutrophil-to-lymphocyte ratio (NLR) and platelet-to-lymphocyte ratio (PLR))                                                                                                                                 | Validation              | Other (Trauma)                                                                                          | Arrival to the ED                                                                                                   | Mortality                                                                            | Se: For the outcome of in-hospital mortality, NLR cutoff 2.77, 70%; PLR cutoff 61.83, 90%<br>Sp: For the outcome of in-hospital mortality, NLR cutoff 2.77, 77%; PLR cutoff 61.83, 85%<br>AUROC: For the outcome of in-hospital mortality, NLR 0.764 (0.636-0.891); PLR 0.928 (0.871-0.985) |

|                |                                                                                                                                                                         |                         |                                                         |                                                                       |                                                                                                                                    |                                                                                                                                                                                                                                                                                                                                                                                                                                                                                                                         |
|----------------|-------------------------------------------------------------------------------------------------------------------------------------------------------------------------|-------------------------|---------------------------------------------------------|-----------------------------------------------------------------------|------------------------------------------------------------------------------------------------------------------------------------|-------------------------------------------------------------------------------------------------------------------------------------------------------------------------------------------------------------------------------------------------------------------------------------------------------------------------------------------------------------------------------------------------------------------------------------------------------------------------------------------------------------------------|
| Thakkar (2018) | Other (White blood cell count, neutrophil percentage, and lymphocyte percentage)                                                                                        | Other (Investigational) | Other (Burn $\geq 10\%$ TBSA)                           | 72h or more post-injury                                               | Other (Infection)                                                                                                                  | aOR: Abnormal lymphocyte percentage on or after 72h postinjury: aOR 7.2 (95%CI, 2.1-24.5)                                                                                                                                                                                                                                                                                                                                                                                                                               |
| Weiss (2019)   | Other (Mitochondrial respiration and content within circulating peripheral blood mononuclear cells)                                                                     | Other (Investigational) | Sepsis                                                  | Days 1-2, 3-5, and 8-14 after sepsis recognition or once for controls | Outcomes related to MODS                                                                                                           | AUROC: Persistently low spare respiratory capacity was predictive of residual organ dysfunction on day 14 (AUC, 0.72; 95% CI, 0.61-0.84)                                                                                                                                                                                                                                                                                                                                                                                |
| Wong (2012)    | Other (PERSEVERE biomarker-based risk stratification tool)                                                                                                              | Derivation              | Sepsis                                                  | First 24h of ICU admission                                            | Mortality                                                                                                                          | Se: For in-hospital mortality, derivation cohort, 91% (95% CI 70 - 98), test cohort, 89% (64 - 98), combined cohorts, 93% (79 - 98)<br>Sp: For in-hospital mortality, derivation cohort, 86% (80 - 90), test cohort, 64% (55 - 73), combined cohorts, 74% (69 - 79)<br>PPV: For in-hospital mortality, derivation cohort, 43% (29 - 58), combined cohorts, 32% (24 - 41)<br>NPV: For in-hospital mortality, derivation cohort, 99% (95 - 100), combined cohorts, 99% (96 - 100)                                         |
| Wong (2014)    | Other (PERSEVERE (C-C chemokine ligand 3 (CCL3), interleukin 8 (IL8), heat shock protein 70 kDa 1B (HSPA1B), granzyme B (GZMB), and matrix metalloproteinase 8 (MMP8))) | Validation              | Sepsis                                                  | First 24h of presentation                                             | Mortality                                                                                                                          | Se: for the outcome of 28-day mortality, 83% (62-95)<br>Sp: 75% (68-82)<br>PPV: 34% (22-47)<br>NPV: 97% (91-99)<br>LRL PLR: (2.4-4.7); NLR: 0.2 (0.1-0.5)<br>AUROC: 0.811 (0.704-0.917)                                                                                                                                                                                                                                                                                                                                 |
| Wong (2015)    | Other (Serum biomarkers: elastase 2 (ELA2), fibroblast growth factor 13 (FGF13), matrix metalloproteinase 8 (MMP8), olfactomedin 4 (OLFM4), and proteinase 3 (PRTN3))   | Derivation              | Sepsis                                                  | Within 24 hours of initial presentation to the PICU with septic shock | Organ-specific outcomes/residual morbidity                                                                                         | Se: For the outcome of septic AKI: derivation cohort, 93 (75-99); test cohort, 85 (61-96)<br>Sp: Derivation cohort, 88 (83-92); test cohort, 77 (70-83)<br>PPV: Derivation cohort, 51 (37-65); test cohort, 29 (18-43)<br>NPV: Derivation cohort, 99 (96-100); test cohort, 98 (93-99)t<br>LR: PLR: Derivation cohort, 7.9 (5.4-11.6); test cohort, 3.7 (2.7-5.2);<br>NLR: Derivation cohort, 0.08 (0.02-0.3); test cohort, 0.2 (0.07-0.6)<br>AUROC: Derivation cohort, 0.95 (0.91-0.99); test cohort, 0.83 (0.72-0.95) |
| Wong (2015)    | Other (tPERSEVERE (temporal PERSEVERE))                                                                                                                                 | Derivation              | Sepsis                                                  | Biomarker changes from days 1 to 3 of septic shock.                   | Other (Complicated course (defined as persistence of two or more organ failures at day seven of septic shock or 28-day mortality)) | Se: Training set: 93% (86-97); test set: 88% (69-97)<br>Sp: Training set: 60% (54-66); test set: 64% (51-75)<br>PPV: Training set: 48% (41-55); test set: 49% (34-64)<br>NPV: Training set: 96% (92-98); test set: 93% (82-99)<br>LR: PLR: Training set: 2.35 (2.01-2.74); test set: 2.47 (1.74-3.50); NLR: training set: 0.11 (0.05-0.23); test set: 0.18 (0.06-0.53)<br>AUROC: Training set: 0.83 (0.79-0.87); test set: 0.84 (0.75-0.92)                                                                             |
| Wong (2017)    | Other (PERSEVERE-XP)                                                                                                                                                    | Derivation              | General PICU population (mixed cardiac and non-cardiac) | Within 24 hours of a septic shock diagnosis                           | Mortality                                                                                                                          | Se: for the outcome of 28-day mortality, and combined derivation and test cohorts: 95% (80-99)<br>Sp: 81% (76-85)<br>PPV: 35% (26-45)<br>NPV: 99% (97-100) PLR: 5.0 (4.0-6.3)                                                                                                                                                                                                                                                                                                                                           |

|               |                                                                                                                                                                                                                                                                                                                           |                         |                        |                                  |           |                                                                                                                                                                                                                                                                                                                                                                                                                                                                                                                              |
|---------------|---------------------------------------------------------------------------------------------------------------------------------------------------------------------------------------------------------------------------------------------------------------------------------------------------------------------------|-------------------------|------------------------|----------------------------------|-----------|------------------------------------------------------------------------------------------------------------------------------------------------------------------------------------------------------------------------------------------------------------------------------------------------------------------------------------------------------------------------------------------------------------------------------------------------------------------------------------------------------------------------------|
|               |                                                                                                                                                                                                                                                                                                                           |                         |                        |                                  |           | LR: NLR: 0.07 (0.02-0.36)<br>AUROC: 0.91 (0.87-0.95)                                                                                                                                                                                                                                                                                                                                                                                                                                                                         |
| Xu (2013)     | Serum/plasma cytokine concentration, Other (Pediatric Multiple Cytokine Score (PMCS) integrated: IL-6, IL-10, TNF-alpha and IFN-gamma)                                                                                                                                                                                    | Other (Investigational) | Sepsis                 | Initial onset of septic shock    | Mortality | AUROC: PMCS 0.83 (0.71-0.94)                                                                                                                                                                                                                                                                                                                                                                                                                                                                                                 |
| Yehya (2018)  | Other (PARDSEVERE (4 biomarkers included in PERSEVERE, plus age, platelets, infectious versus noninfectious ARDS etiology, presence or absence of an immunocompromising condition, and initial and 24-hour PaO2/FiO2 and OI))                                                                                             | Derivation              | Other (Pediatric ARDS) | Within 24 hours of ARDS onset    | Mortality | Se: for the outcome of PICU mortality, derivation (n=122) 1 (0.78-1); test (n=30) 0.83 (0.36-0.99)<br>Sp: derivation (n=122) 0.65 (0.55-0.74); test (n=30) 0.71 (0.49-0.87)<br>PPV: derivation (n=122) 0.33 (0.21-0.48); test (n=30) 0.42 (0.16-0.71)<br>NPV: derivation (n=122) 1 (0.93-1); test (n=30) 0.94 (0.71-1)<br>LR: PLR: derivation (n=122) 2.9 (2.2-3.8); test (n=30) 2.9 (1.4-5.9); NLR: derivation (n=122) NA; test (n=30) 0.2 (0-1.4)<br>AUROC: derivation (n=122) 0.85 (0.78-0.92); test (n=30) 0.82 (0.62-1) |
| Zinter (2017) | Serum/plasma cytokine concentration, Other (OI plus: interferon- $\gamma$ , IL-1 $\alpha$ , IL-1 $\beta$ , IL-1RA, IL-2, IL-3, IL-4, IL-5, IL-6 IL-7, IL-8, IL-10, IL-12, IL-15, IL-17, IL-18, IL-23, MIP-1 $\alpha$ , MIP-1 $\beta$ , TNF- $\alpha$ , and TNFR2; biomarkers of endothelial injury (Ang-2, vWF, and sTM)) | Other (Investigational) | Other (Pediatric ARDS) | Within 24 hours of onset of ARDS | Mortality | AUROC: For mortality or severe morbidity: OI 0.70 (95% CI, 0.62-0.77); OI, IL-8, and TNF-R2 0.77 (95% CI, 0.70-0.83); OI, IL-6, IL-8, IL-10, TNF-R2, and hematopoietic cellular transplantation (HCT) history 0.79 (95% CI, 0.72-0.86)                                                                                                                                                                                                                                                                                       |

Abbreviations: Se, sensitivity; Sp, specificity; PPV, positive predictive value; NPV, negative predictive value; LR, likelihood ratio; AUROC, area under the receiver operating characteristics curve; aOR, adjusted odds ratio; PICU, pediatric intensive care unit; PCICU, pediatric cardiac intensive care unit

## References

1. Allen ML, Peters MJ, Goldman A, et al. Early postoperative monocyte deactivation predicts systemic inflammation and prolonged stay in pediatric cardiac intensive care. *Crit Care Med*. 2002;30(5):1140-5.
2. Allen ML, Hoschtitzky JA, Peters MJ, et al. Interleukin-10 and its role in clinical immunoparalysis following pediatric cardiac surgery. *Crit Care Med*. 2006;34(10):2658-2665.
3. Andruszkow H, Fischer J, Sasse M, et al. Interleukin-6 as inflammatory marker referring to multiple organ dysfunction syndrome in severely injured children. *Scandinavian journal of trauma, resuscitation and emergency medicine*. 2014;22:16.
4. Boeddha NP, Kerklaan D, Dunbar A, et al. HLA-DR expression on monocyte subsets in critically ill children. *Pediatr Infect Dis J*. 2018;37(10):1034-1040.
5. Bucuvalas J, Filipovich L, Yazigi N, et al. Immunophenotype predicts outcome in pediatric acute liver failure. *J Pediatr Gastroenterol Nutr*. 2013;56(3):311-5.
6. Cabrera AG, Dyamenahalli U, Gossett J, et al. Preoperative lymphopenia is a predictor of postoperative adverse outcomes in children with congenital heart disease. *J Thorac Cardiovasc Surg*. 2009;138(5):1172-9.
7. Carcillo JA, Sward K, Halstead ES, et al. A systemic inflammation mortality risk assessment contingency table for severe sepsis. *Pediatric critical care medicine : a journal of the Society of Critical Care Medicine and the World Federation of Pediatric Intensive and Critical Care Societies*. 2017;18(2):143-150.
8. Christensen RD, Baer VL, Gordon PV, et al. Reference ranges for lymphocyte counts of neonates: Associations between abnormal counts and outcomes. *Pediatrics*. 2012;129(5):1165.
9. Cornell TT, Sun L, Hall MW, et al. Clinical implications and molecular mechanisms of immunoparalysis after cardiopulmonary bypass. *J Thorac Cardiovasc Surg*. 2012;143(5):1160-1166.e1.
10. Cui Y, Xiong X, Ren Y, Wang F, Wang C, Zhang Y. CD163 as a valuable diagnostic and prognostic biomarker of sepsis-associated hemophagocytic lymphohistiocytosis in critically ill children. *Pediatr Blood Cancer*. 2019;66(10):e27909.
11. Felmet KA, Hall MW, Clark RS, Jaffe R, Carcillo JA. Prolonged lymphopenia, lymphoid depletion, and hypoprolactinemia in children with nosocomial sepsis and multiple organ failure. *J Immunol*. 2005;174(6):3765-3772.

12. Fiore-Gartland A, Panoskaltsis-Mortari A, Agan AA, et al. Cytokine profiles of severe influenza virus-related complications in children. *Frontiers in Immunology*. 2017;8.
13. Ganda IJ, Milda, Lawang SA, Daud D. Initial serum level of IL-10 as an outcome predictor in children with sepsis. *Current Pediatric Research*. 2018;22(2):152-156.
14. Ganda IJ, Andriani Y, Lawang SA, Daud D. Initial serum level of TNF- $\alpha$  as an outcome predictor in pediatric patient with sepsis. *Current Pediatric Research*. 2018;22(2):146-151.
15. Genel F, Atlihan F, Ozsu E, Ozbek E. Monocyte HLA-DR expression as predictor of poor outcome in neonates with late onset neonatal sepsis. *J Infect*. 2010;60(3):224-8.
16. Hall MW, Gavrilin MA, Knatz NL, Duncan MD, Fernandez SA, Wewers MD. Monocyte mRNA phenotype and adverse outcomes from pediatric multiple organ dysfunction syndrome. *Pediatr Res*. 2007;62(5):597-603.
17. Hall MW, Knatz NL, Vetterly C, et al. Immunoparalysis and nosocomial infection in children with multiple organ dysfunction syndrome. *Intensive Care Med*. 2011;37(3):525-532.
18. Hall MW, Geyer SM, Guo CY, et al. Innate immune function and mortality in critically ill children with influenza: A multicenter study. *Crit Care Med*. 2013;41(1):224-36.
19. Hoffman JA, Weinberg KI, Azen CG, et al. Human leukocyte antigen-DR expression on peripheral blood monocytes and the risk of pneumonia in pediatric lung transplant recipients. *Transplant infectious disease : an official journal of the Transplantation Society*. 2004;6(4):147-55.
20. Ibrahiem SK, Galal YS, Youssef MR, Sedrak AS, El Khateeb EM, Abdel-Hameed N. Prognostic markers among egyptian children with sepsis in the intensive care units, cairo university hospitals. *Allergol Immunopathol*. 2016;44(1):46-53.
21. Jacobs L, Berrens Z, Stenson EK, et al. Interleukin-27 as a candidate diagnostic biomarker for bacterial infection in immunocompromised pediatric patients. *PLoS One*. 2018;13(11):e0207620. doi: 10.1371/journal.pone.0207620.
22. Lodwick DL, Cooper JN, Kenney B, Deans KJ, Minneci PC, Thakkar RK. Lymphocyte depression as a predictor of postoperative intraabdominal abscess after appendectomy in children. *J Pediatr Surg*. 2017;52(1):93-97.

23. Manzoli TF, Troster EJ, Ferranti JF, Sales MM. Prolonged suppression of monocytic human leukocyte antigen-DR expression correlates with mortality in pediatric septic patients in a pediatric tertiary intensive care unit. *J Crit Care*. 2016;33:84-89.
24. Mella C, Suarez-Arrabal MC, Lopez S, et al. Innate immune dysfunction is associated with enhanced disease severity in infants with severe respiratory syncytial virus bronchiolitis. *J Infect Dis*. 2013;207(4):564-573.
25. Muszynski JA, Nofziger R, Greathouse K, et al. Innate immune function predicts the development of nosocomial infection in critically injured children. *Shock (Augusta, Ga.)*. 2014;42(4):313-21.
26. Muszynski JA, Nofziger R, Moore-Clingenpeel M, et al. Early immune function and duration of organ dysfunction in critically ill children with sepsis. *Am J Respir Crit Care Med*. 2018;198(3):361-369.
27. Ödek C, Kendirli T, Doğu F, et al. Patients with primary immunodeficiencies in pediatric intensive care unit: Outcomes and mortality-related risk factors. *J Clin Immunol*. 2014;34(3):309-315.
28. Savluk OF, Guzelmeric F, Yavuz Y, et al. Neutrophil-lymphocyte ratio as a mortality predictor for norwood stage I operations. *Gen Thorac Cardiovasc Surg*. 2019;67(8):669-676.
29. Tekin YK. Are neutrophil-to-lymphocyte and platelet-to-lymphocyte ratios associated with mortality in pediatric trauma patients? A retrospective study. *Rambam Maimonides Med J*. 2019;10(4).
30. Thakkar RK, Diltz Z, Drews JD, et al. Abnormal lymphocyte response after pediatric thermal injury is associated with adverse outcomes. *J Surg Res*. 2018;228:221-227.
31. Weiss SL, Zhang D, Bush J, et al. Persistent mitochondrial dysfunction linked to prolonged organ dysfunction in pediatric sepsis. *Crit Care Med*. 2019;47(10):1433-1441.
32. Wong HR, Salisbury S, Xiao Q, et al. The pediatric sepsis biomarker risk model. *Critical Care*. 2012;16(5).
33. Wong HR, Weiss SL, Giuliano JS, J., et al. Testing the prognostic accuracy of the updated pediatric sepsis biomarker risk model. *PloS one*. 2014;9(1):e86242.
34. Wong HR, Cvijanovich NZ, Anas N, et al. A multibiomarker-based model for estimating the risk of septic acute kidney injury. *Crit Care Med*. 2015;43(8):1646-1653.

35. Wong HR, Cvijanovich NZ, Anas N, et al. Prospective testing and redesign of a temporal biomarker based risk model for patients with septic shock: Implications for septic shock biology. *EBioMedicine*. 2015;2(12):2087-93.
36. Wong HR, Cvijanovich NZ, Anas N, et al. Improved risk stratification in pediatric septic shock using both protein and mRNA biomarkers. PERSEVERE-XP. *American journal of respiratory and critical care medicine*. 2017;196(4):494-501.
37. Xu XJ, Tang YM, Song H, et al. A multiplex cytokine score for the prediction of disease severity in pediatric hematology/oncology patients with septic shock. *Cytokine*. 2013;64(2):590-6.
38. Yehya N, Wong HR. Adaptation of a biomarker-based sepsis mortality risk stratification tool for pediatric acute respiratory distress syndrome. *Crit Care Med*. 2018;46(1):e9-e16.
39. Zinter MS, Orwoll BE, Spicer AC, et al. Incorporating inflammation into mortality risk in pediatric acute respiratory distress syndrome. *Crit Care Med*. 2017;45(5):858-866.

## Research Priorities

The non-cellular elements of the immune response have been the subject of frequent investigation in critically ill children. High serum levels of inflammatory biomarkers including C-reactive protein, ferritin, and soluble CD163 have been associated with the presence of infection and other inflammatory disorders including hemophagocytic lymphohistiocytosis, and may have a role in predicting mortality in septic children.<sup>1,2</sup> High levels of cytokines and chemokines have also been consistently associated with morbidity and mortality from pediatric critical illness. Elevated serum levels of pro-inflammatory mediators such as interleukin (IL)-6, IL-8, soluble IL-2 receptor, interferon- $\gamma$ -inducible protein (IP)10, monocyte chemoattractant protein (MCP)-1, macrophage inflammatory protein (MIP)-1 $\alpha$  have all been associated with increased nosocomial infection and/or mortality risks in children with sepsis,<sup>3-8</sup> critical influenza,<sup>9-11</sup> acute respiratory distress syndrome (ARDS),<sup>12</sup> liver failure,<sup>13</sup> and/or trauma.<sup>14-16</sup> Multiple studies have also associated high serum levels of anti-inflammatory cytokines with adverse outcomes from pediatric critical illness, often concurrent with elevations in levels of pro-inflammatory mediators. Evidence of this “cytokine storm” include elevations of serum IL-10 levels in children who go on to develop nosocomial infection or death after sepsis,<sup>17-19</sup> trauma,<sup>14</sup> lung transplantation,<sup>20</sup> and cardiopulmonary bypass.<sup>21,22</sup> These biomarkers represent a small fraction of the total number of pro- and anti-inflammatory mediators whose systemic levels have been associated with adverse outcomes from adult and pediatric critical illness.

Rather than focusing on single serum protein mediators, Wong et al developed and validated a panel of biomarkers including C-C chemokine ligand 3, IL-8, heat shock protein 70 kDa 1B, granzyme B, and matrix metalloproteinase 8 in septic children.<sup>23,24</sup> This panel, when measured in the first 24 hours of pediatric septic shock, was able to reliably estimate mortality

probability in a multi-center, heterogeneous cohort. It is currently unclear if this panel can predict outcomes in the wider pediatric ICU setting with it may have utility in children with ARDS.<sup>25</sup> Cytokine and chemokine levels were not included in the current definitions of immune system dysfunction because 1) they are not yet available for measurement in the clinical laboratory, 2) the validation of thresholds for individual mediators that reliably identify children at risk for adverse outcomes across diagnoses has proven to be challenging, and 3) elevations in serum protein levels do not necessarily imply dysfunction of leukocytes. Elevations in serum cytokine levels, while predictive of outcomes, may be representative of initial severity of illness and tissue injury rather than solely diagnostic of immune system dysfunction.

Transcriptomic studies, by contrast, have identified patterns of mRNA expression by leukocytes from critically ill children. Wong et al was able to demonstrate segregation of children with septic shock into discrete endotypes through mRNA profiling of whole blood.<sup>26</sup> Reduced expression of a panel of gene products associated with lymphocyte signaling was associated with increased risks of mortality and prolonged organ dysfunction. Weiss et al recently reported an association between persistent impairment of mitochondrial function in peripheral blood mononuclear cells and persistence of organ dysfunction in septic children.<sup>27</sup> While being more specific to leukocyte function, these assays are not yet available for clinical use. While many biomarkers of the inflammatory response are not specific to the immune system, it is likely that proteomic profiling,<sup>28, 29</sup> transcriptomic profiling,<sup>30</sup> or a combination of both<sup>31, 32</sup> may allow us to identify children with immune system dysfunction in the pediatric ICU.

Although absolute cellular numbers are included in these definitions of immune dysfunction, the composition of subtypes of leukocytes as well as changes in the composition of circulating leukocytes over time may have utility in predicting outcomes from pediatric critical

illness. Gaining more insight, for example, into the significance of the neutrophil/lymphocyte ratio<sup>33, 34</sup> and developing high-throughput phenotyping procedures that can rapidly differentiate leukocyte subtypes<sup>35</sup> would further enhance our understanding of immune dysfunction in pediatric critical illness.

## References for Research Priorities:

1. Carcillo JA, Sward K, Halstead ES, et al. A Systemic Inflammation Mortality Risk Assessment Contingency Table for Severe Sepsis. *Pediatr Crit Care Med*. 2017;18(2):143-150.
2. Cui Y, Xiong X, Ren Y, Wang F, Wang C and Zhang Y. CD163 as a valuable diagnostic and prognostic biomarker of sepsis-associated hemophagocytic lymphohistiocytosis in critically ill children. *Pediatr Blood Cancer*. 2019;66(10):e27909.
3. Doughty LA, Kaplan SS and Carcillo JA. Inflammatory cytokine and nitric oxide responses in pediatric sepsis and organ failure. *Crit Care Med*. 1996;24(7):1137-43.
4. Muszynski JA, Nofziger R, Moore-Clingenpeel M, et al. Early Immune Function and Duration of Organ Dysfunction in Critically Ill Children with Sepsis. *Am J Respir Crit Care Med*. 2018;198(3):361-369.
5. Wong HR, Cvijanovich N, Wheeler DS, et al. Interleukin-8 as a stratification tool for interventional trials involving pediatric septic shock. *Am J Respir Crit Care Med*. 2008;178(3):276-82.
6. Fioretto JR, Martin JG, Kurokawa CS, et al. Interleukin-6 and procalcitonin in children with sepsis and septic shock. *Cytokine*. 2008;43(2):160-4.
7. Remy S, Kolev-Descamps K, Gossez M, et al. Occurrence of marked sepsis-induced immunosuppression in pediatric septic shock: a pilot study. *Ann Intensive Care*. 2018;8(1):36.
8. Ganda IJ, Andriani Y, Lawang SA and Daud D. Initial serum level of TNF- $\alpha$  as an outcome predictor in pediatric patient with sepsis. *Current Pediatric Research*. 2018;22(2):146-151.
9. Hall MW, Geyer SM, Guo CY, et al. Innate immune function and mortality in critically ill children with influenza: a multicenter study. *Critical care medicine*. 2013;41(1):224-36.
10. Novak T, Hall MW, McDonald DR, et al. RIG-I and TLR4 responses and adverse outcomes in pediatric influenza-related critical illness. *J Allergy Clin Immunol*. 2020.
11. Fiore-Gartland A, Panoskaltsis-Mortari A, Agan AA, et al. Cytokine profiles of severe influenza virus-related complications in children. *Frontiers in Immunology*. 2017;8(NOV).

12. Zinter MS, Orwoll BE, Spicer AC, et al. Incorporating Inflammation into Mortality Risk in Pediatric Acute Respiratory Distress Syndrome. *Critical care medicine*. 2017;45(5):858-866.
13. Bucuvalas J, Filipovich L, Yazigi N, et al. Immunophenotype predicts outcome in pediatric acute liver failure. *Journal of pediatric gastroenterology and nutrition*. 2013;56(3):311-5.
14. Muszynski JA, Nofziger R, Greathouse K, et al. Innate immune function predicts the development of nosocomial infection in critically injured children. *Shock (Augusta, Ga.)*. 2014;42(4):313-21.
15. Ozturk H, Yagmur Y and Ozturk H. The prognostic importance of serum IL-1beta, IL-6, IL-8 and TNF-alpha levels compared to trauma scoring systems for early mortality in children with blunt trauma. *Pediatr Surg Int*. 2008;24(2):235-9.
16. Andruszkow H, Fischer J, Sasse M, et al. Interleukin-6 as inflammatory marker referring to multiple organ dysfunction syndrome in severely injured children. *Scandinavian journal of trauma, resuscitation and emergency medicine*. 2014;22:16.
17. Doughty L, Carcillo JA, Kaplan S and Janosky J. The compensatory anti-inflammatory cytokine interleukin 10 response in pediatric sepsis-induced multiple organ failure. *Chest*. 1998;113(6):1625-31.
18. Muszynski JA, Nofziger R, Greathouse K, et al. Early adaptive immune suppression in children with septic shock: a prospective observational study. *Crit Care*. 2014;18(4):R145.
19. Ganda IJ, Milda, Lawang SA and Daud D. Initial serum level of IL-10 as an outcome predictor in children with sepsis. *Current Pediatric Research*. 2018;22(2):152-156.
20. Hoffman JA, Weinberg KI, Azen CG, et al. Human leukocyte antigen-DR expression on peripheral blood monocytes and the risk of pneumonia in pediatric lung transplant recipients. *Transpl Infect Dis*. 2004;6(4):147-55.
21. Allen ML, Hoschitzky JA, Peters MJ, et al. Interleukin-10 and its role in clinical immunoparalysis following pediatric cardiac surgery. *Crit Care Med*. 2006;34(10):2658-65.
22. Cornell TT, Sun L, Hall MW, et al. Clinical implications and molecular mechanisms of immunoparalysis after cardiopulmonary bypass. *J Thorac Cardiovasc Surg*. 2012;143(5):1160-1166 e1.
23. Wong HR, Weiss SL, Giuliano JS, Jr., et al. Testing the prognostic accuracy of the updated pediatric sepsis biomarker risk model. *PLoS One*. 2014;9(1):e86242.
24. Wong HR, Salisbury S, Xiao Q, et al. The pediatric sepsis biomarker risk model. *Crit Care*. 2012;16(5):R174.
25. Yehya N and Wong HR. Adaptation of a Biomarker-Based Sepsis Mortality Risk Stratification Tool for Pediatric Acute Respiratory Distress Syndrome. *Critical Care Medicine*. 2018;46(1):e9-e16.
26. Wong HR, Cvijanovich NZ, Anas N, et al. Developing a clinically feasible personalized medicine approach to pediatric septic shock. *Am J Respir Crit Care Med*. 2015;191(3):309-15.
27. Weiss SL, Zhang D, Bush J, et al. Persistent Mitochondrial Dysfunction Linked to Prolonged Organ Dysfunction in Pediatric Sepsis. *Crit Care Med*. 2019;47(10):1433-1441.

28. Wong HR, Cvijanovich NZ, Anas N, et al. Prospective Testing and Redesign of a Temporal Biomarker Based Risk Model for Patients With Septic Shock: Implications for Septic Shock Biology. *EBioMedicine*. 2015;2(12):2087-93.
29. Xu XJ, Tang YM, Song H, et al. A multiplex cytokine score for the prediction of disease severity in pediatric hematology/oncology patients with septic shock. *Cytokine*. 2013;64(2):590-6.
30. Wong HR, Cvijanovich NZ, Anas N, et al. Endotype Transitions During the Acute Phase of Pediatric Septic Shock Reflect Changing Risk and Treatment Response. *Crit Care Med*. 2018;46(3):e242-e249.
31. Wong HR, Atkinson SJ, Cvijanovich NZ, et al. Combining Prognostic and Predictive Enrichment Strategies to Identify Children With Septic Shock Responsive to Corticosteroids. *Crit Care Med*. 2016;44(10):e1000-3.
32. Wong HR, Cvijanovich NZ, Anas N, et al. Improved Risk Stratification in Pediatric Septic Shock Using Both Protein and mRNA Biomarkers. PERSEVERE-XP. *Am J Respir Crit Care Med*. 2017;196(4):494-501.
33. Savluk OF, Guzelmeric F, Yavuz Y, et al. Neutrophil-lymphocyte ratio as a mortality predictor for Norwood stage I operations. *Gen Thorac Cardiovasc Surg*. 2019;67(8):669-676.
34. Tekin YK. Are Neutrophil-to-Lymphocyte and Platelet-to-Lymphocyte Ratios Associated with Mortality in Pediatric Trauma Patients? A Retrospective Study. *Rambam Maimonides Med J*. 2019;10(4).
35. Ibrahiem SK, Galal YS, Youssef MR, Sedrak AS, El Khateeb EM and Abdel-Hameed ND. Prognostic markers among Egyptian children with sepsis in the Intensive Care Units, Cairo University Hospitals. *Allergologia et immunopathologia*. 2016;44(1):46-53.
